# Supplementary material for: ITO-free carrier-selective contact for crystalline silicon solar cells
Source: Royal Society of Chemistry journal article supplement (doi:10.1039/c8ta11220g), 2019-01-01
Supplement: c8ta11220g1.pdf [file c8ta11220g1.pdf]

## **Electronic Supplementary Information (ESI) for**

# **ITO-free Carrier Selective Contact for Crystalline Silicon Solar Cell**

*Deokjae Choi,<sup>a, b</sup> Hyun Yoon,<sup>c</sup> Ka-Hyun Kim,<sup>c,d,\*</sup> Han-Don Um,<sup>a,\*</sup> and Kwanyong Seo <sup>a,\*</sup>*

<sup>a</sup> Department of Energy Engineering, Ulsan National Institute of Science and Technology (UNIST), Ulsan 44919, Republic of Korea

<sup>b</sup> Max Planck Center for Attosecond Science, Max Planck POSTECH/KOREA Research Initiative, Pohang, Gyeongbuk 37673, Republic of Korea

<sup>c</sup> KIER-UNIST, Advanced Center for Energy, Korea Institute for Energy Research, Ulsan 44919, Republic of Korea

<sup>d</sup> Division of Energy & Optical Technology Convergence, Cheongju University, Cheongju 28503, Republic of Korea

\* Address correspondence to: [kseo@unist.ac.kr](mailto:kseo@unist.ac.kr), [handon@unist.ac.kr](mailto:handon@unist.ac.kr), [ka-hyun.kim@kier.re.kr](mailto:ka-hyun.kim@kier.re.kr)

## SUPPORTING FIGURES

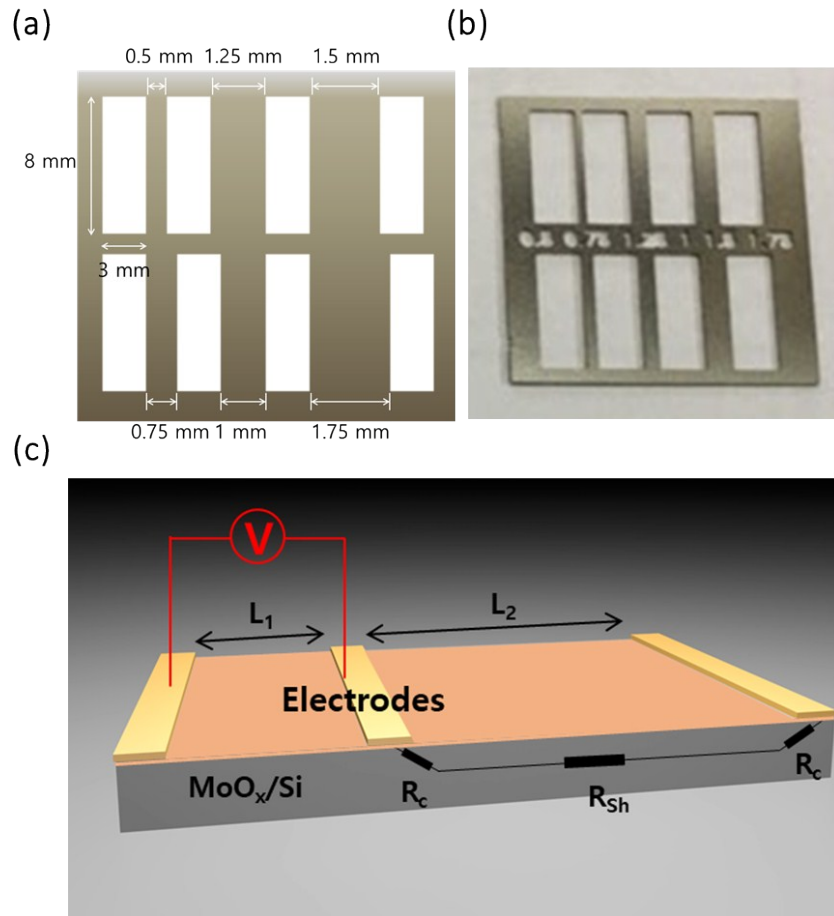

**Fig. S1.** (a) A design schematic and (b) an optical image of metal shadow mask used for Transfer Length Method in this work. (c) A schematic showing the measurement of Transfer Length Method where  $L$  is a distance between electrodes,  $R_c$  is contact resistance between metal and semiconductor, and  $R_{sh}$  is sheet resistance of semiconductor.

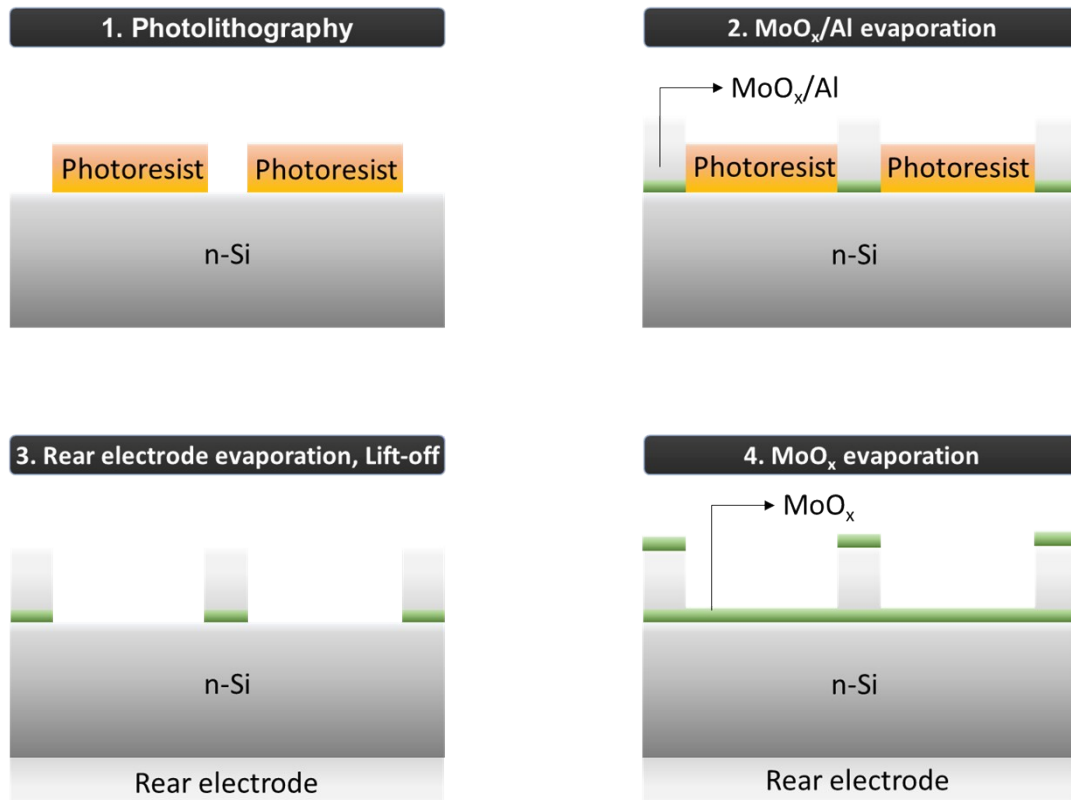

**Fig. S2.** (a) Schematics of the fabrication processes for ITO-free  $\text{MoO}_x/\text{n-Si}$  solar cells.

(a)

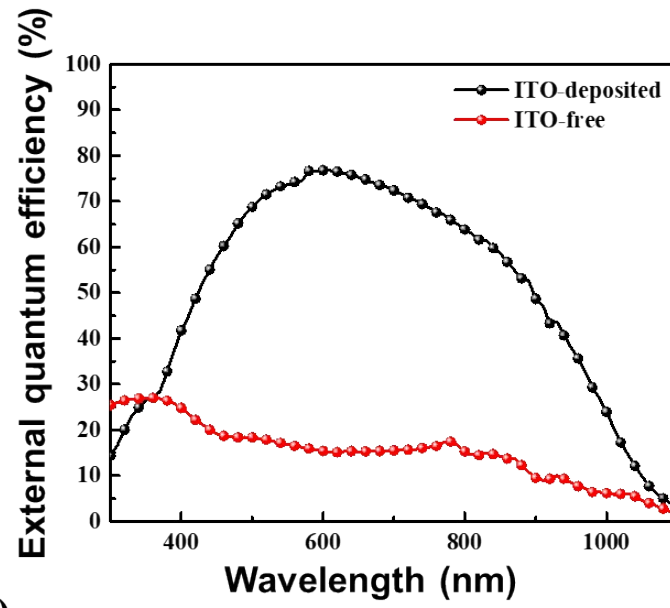

(b)

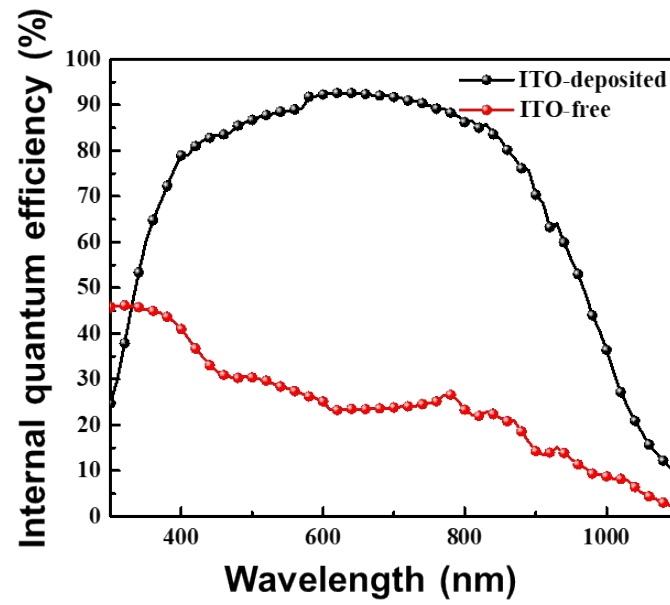

**Fig. S3.** (a) External and (b) Internal quantum efficiency of MoO<sub>x</sub>/n-Si solar cells with (black solid lines) and without ITO (red solid lines) layer using busbar and finger electrode.

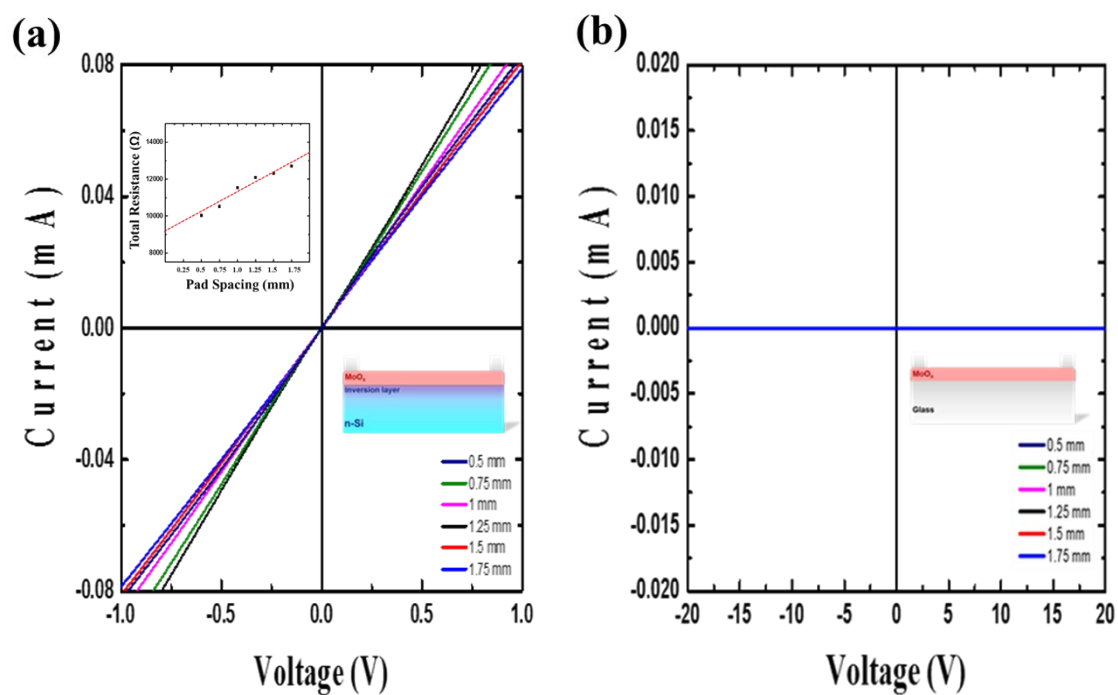

**Fig. S4.** Current-voltage measurements of 20-nm-thick  $\text{MoO}_x/\text{Al}$  contacts on (a) n-Si and (d) glass substrates. Inset of panel (a) shows resistance depending on the pad spacing.

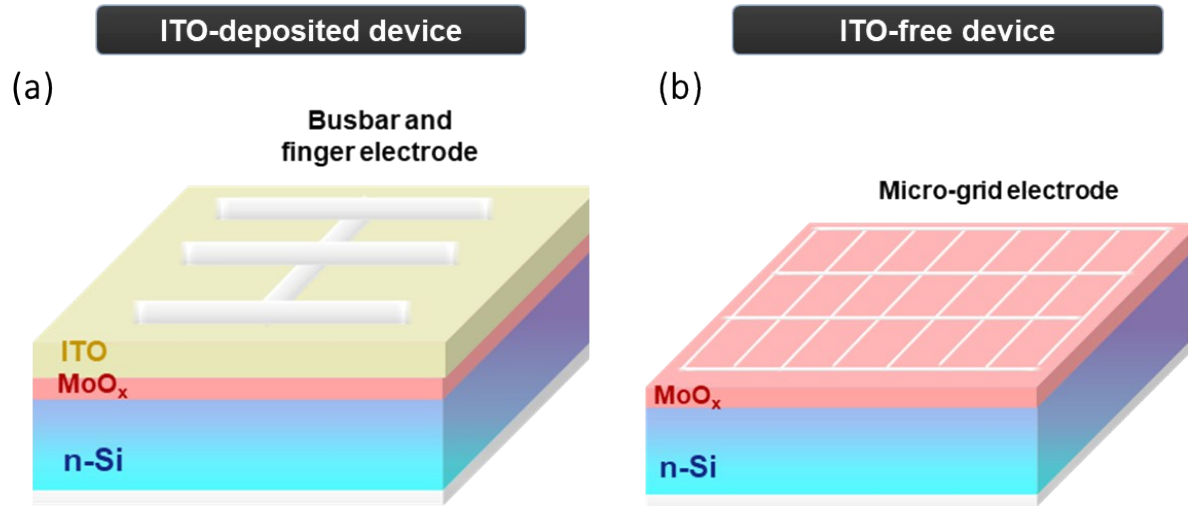

**Fig. S5.** Schematics of the structures of (a) ITO-deposited and (b) ITO-free MoO<sub>x</sub>/n-Si solar cells for the analysis of current density losses.

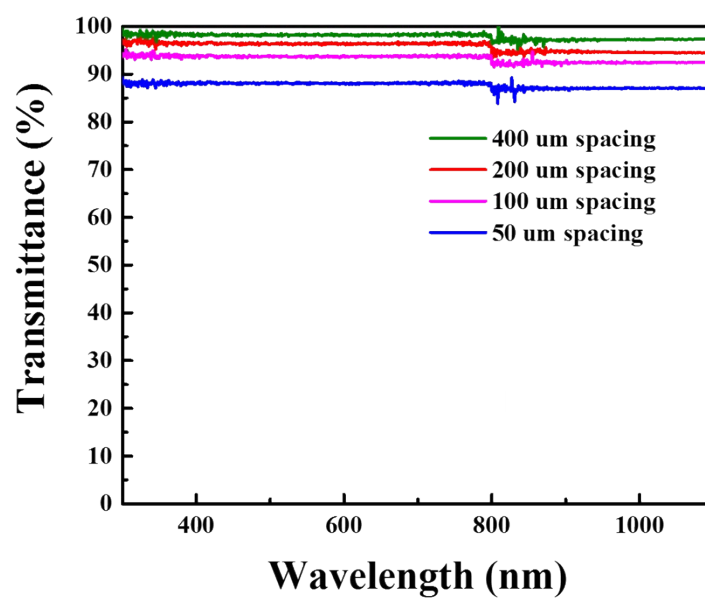

**Fig. S6.** Transmittance spectra of micro-grid electrodes with spacing of 50, 100, 200 and 400  $\mu\text{m}$ .

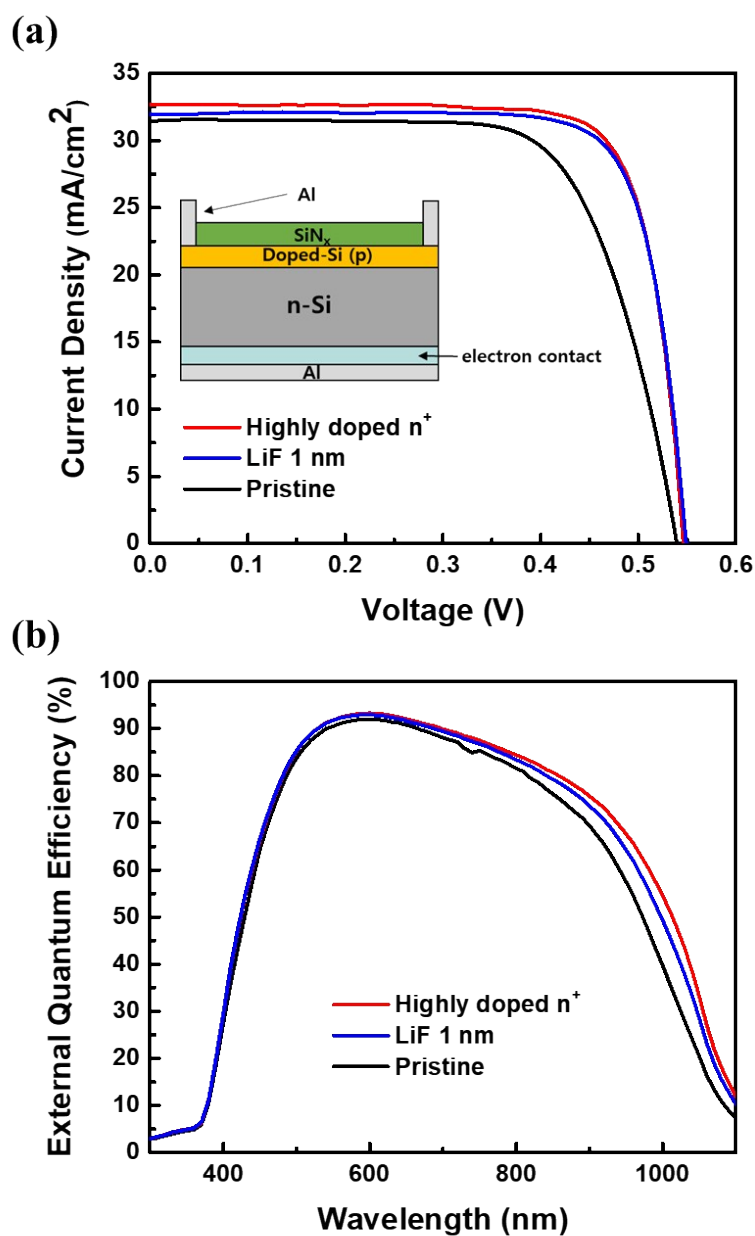

**Fig. S7.** (a)  $J$ - $V$  curves and (b) External quantum efficiency of c-Si solar cells according to the different electron contact layer (Pristine, LiF and highly doped  $n^+$ ). All of devices are fabricated with identical conditions except for rear side of device.



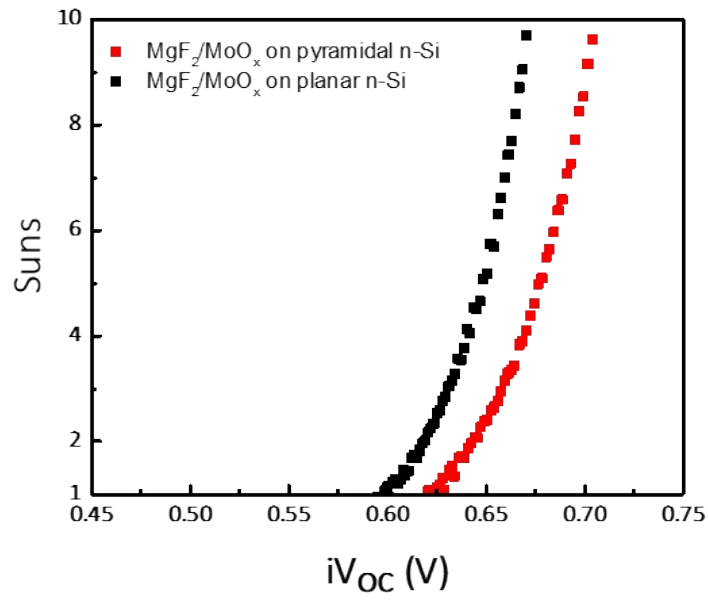

**Fig. S8.** Implied-open-circuit voltages ( $iV_{oc}$ ) of  $MgF_2(100\text{ nm})/MoO_x(20\text{ nm})/n\text{-Si}$  substrates with planar (black-filled square) and pyramidal structures (red-filled square) using Quasi-Steady State photoconductance measurements.

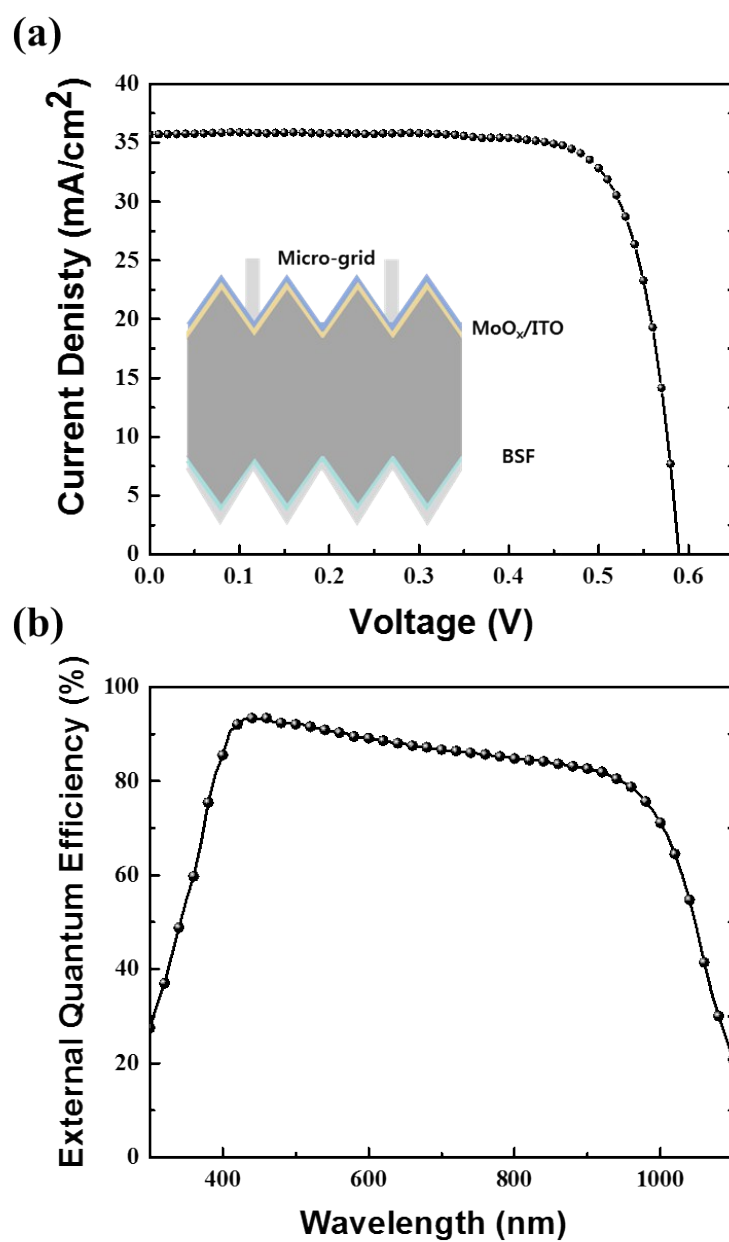

**Fig. S9.** (a)  $J$ - $V$  curves and (b) External quantum efficiency of ITO-deposited  $\text{MoO}_x/\text{n-Si}$  solar cells using micro-grid electrode with spacing of  $200\ \mu\text{m}$ .

**Supplementary Note 1.** Calculation process of resistive and optical power losses during the transport of photocarrier through inversion layer.<sup>1</sup>

### Section 1. Resistive power loss calculation

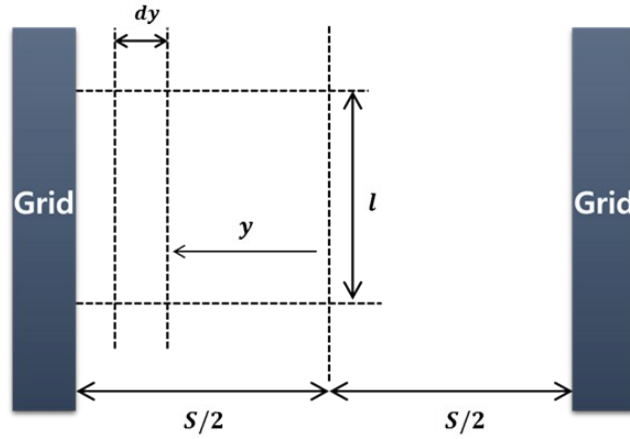

The resistive power loss caused by the resistance of inversion layer ( $R_s$ ) can be calculated as a function of electrode spacing. We setup the separated metal grid electrodes with the spacing ( $S$ ) on the planar substrate with resistance ( $R$ ). The incremental resistive power loss ( $dP_{loss}$ ) is given by

$$dP_{loss} = I^2 dR$$

The differentiated  $R$  can be represented as

$$dR = \frac{\rho}{lt} dy = \frac{R_s}{l} dy$$

where  $\rho$  is the resistivity of inversion layer,  $t$  is the thickness of inversion layer,  $l$  is the length along the metal grid electrode,  $y$  is the distance from the metal grid electrode and  $R_s$  is sheet resistance of inversion layer. Under uniform illumination, the current ( $I$ ) depends on  $y$  which is given by

$$I(y) = J ly$$

where  $J$  is the current density. Thus, the total power loss can be shown as

$$dP_{loss} = \int I(y)^2 dR = \int_0^{S/2} \frac{J^2 l^2 y^2 R_s dy}{l} = \frac{J^2 l R_s S^3}{24}$$

The maximum power photovoltaic device generates,  $P_{gen}$  is given by

$$P_{gen} = J_{MP} l \frac{S}{2} V_{MP}$$

Thus, the fractional power loss is calculated as follow:

$$Fractional P_{loss} = \frac{P_{loss}}{P_{gen}} * 100 = \frac{R_s l S^2 J_{MP}}{12 V_{MP}} * 100$$

Here,  $J_{mp}$ ,  $V_{mp}$  and  $R_s$  values of ITO-free MoO<sub>x</sub>/n-Si solar cell are 30 mA/cm<sup>2</sup>, 450 mV and 16,000 Ω/sq respectively.

## Section 2. Optical power loss calculation

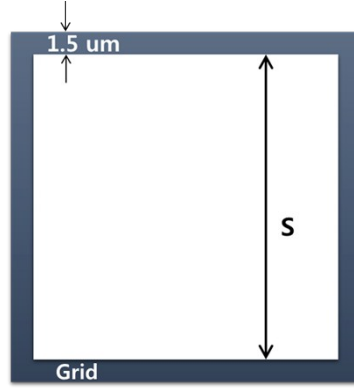

The optical power loss caused by metal electrode is calculated from its shading loss based on the following assumption; Photons are lost by only the metal reflection under uniform illumination. To calculate the shading loss of metal electrode, we considered the unit square of grid metal electrode with width of 3 μm (1.5 μm + 1.5 μm) with various spacings between two grid electrodes. Whole area of the device is given by

$$\text{Whole area} = (S + 3)^2$$

The area of metal electrode is given by

$$\text{Metal electrode area} = 4 \times 1.5 \times (S + 1.5)$$

Thus, the total shading loss is given by

$$\text{Total shading loss} = \frac{6(S + 1.5)}{(S + 3)^2} \times 100$$

Then, we calculated resistive and optical power losses by varying the spacing between electrodes ( $S$ ) from 0 to 1,000 μm.

### **Supplementary References**

1. Lee, H. S., *Thermal design: heat sinks, thermoelectrics, heat pipes, compact heat exchangers, and solar cells.*, John Wiley & Sons, New Jersey, 2010.
